# Supplementary material for: Effects of implementation leadership of head nurses on nurses' evidence-based pain management practices behavior
Source: Research Square preprint supplement (doi:10.21203/rs.3.rs-5684249/v1), 2025-04-09
Supplement: Supplementary file 1 [file 0d251bddab99715eb23cad58.docx]

**Appendix**

**Nurses’ evidence-based pain management practices behavior questionnaire**

Items 1~9：pain screening and comprehensive assessment

Items 10~18：pain intervention and education

Items 19~21：pain nursing record

| Items |
| --- |
| 1. I screen patients for pain during admission assessment. |
| 2. I assessed the intensity of the patient's resting pain and activity pain separately. |
| 3. I assess the characteristics of the patient's pain (e.g., intensity, nature, location, etc.) |
| 4. I assess the patient's past pain and use of analgesic medications. |
| 5. I assess the impact of pain on patients' self-care, somatic functioning, and psychosocial burdens. |
| 6. When the patient is pain free or in mild pain, I perform at least 1 pain assessment per day until the patient is discharged. |
| 7. When the patient has moderate to severe pain or pain interventions are used (including medication management, use of PCA pumps, etc.), I conduct a pain assessment at least every 8 hours or every shift. |
| 8. I use a variety of ways to ask patients to self-report pain as much as possible. |
| 9. When I do not have access to the patient's pain complaints, I use a nonverbal or behavioral assessment tool with good reliability (e.g., the Nonverbal Pain Indicator Scale (CNPI) or the Critical Patient Pain Observation Tool (CPOT)) for pain assessment. |
| 10. I enhance the prevention, assessment and management of adverse effects and risks in patients with long-term use of opioid analgesics. |
| 11. I used non-pharmacological intervention aids (including cognitive-behavioral interventions such as breathing relaxation, music therapy, etc.) with my patients to improve pain management outcomes. |
| 12. I discuss and communicate with the supervising physician or multidisciplinary team to develop a personalized comprehensive pain management plan based on the patient's individual situation. |
| 13. When patients are discharged from the hospital, I assess their overall satisfaction with their pain management. |
| 14. I encourage patients to be proactive in pain self-management. |
| 15. I proactively provide patients and families with information about pain management strategies, address their concerns, and correct their misperceptions. |
| 16. When the patient is discharged from the hospital, I continue to provide health education to the patient and family related to pain management. |
| 17. I have received systematic training and learning on knowledge related to pain assessment and management. |
| 18. The department conducts regular quality control and continuous quality improvement of pain care. |
| 19. I document the results of the pain screening at the admission assessment. |
| 20. I record information about each pain characteristic (e.g., pain intensity, location, etc.) obtained from the comprehensive assessment. |
| 21. I keep a dynamic and timely record of my pain assessment results after implementing analgesic interventions. |
